# Supplementary figures and images for: Age- and calorie-independent life span extension from dietary restriction by bacterial deprivation in Caenorhabditis elegans
Source: Springer Nature journal article supplement (doi:10.1186/1471-213x-8-49), 2008-05-05

**A.**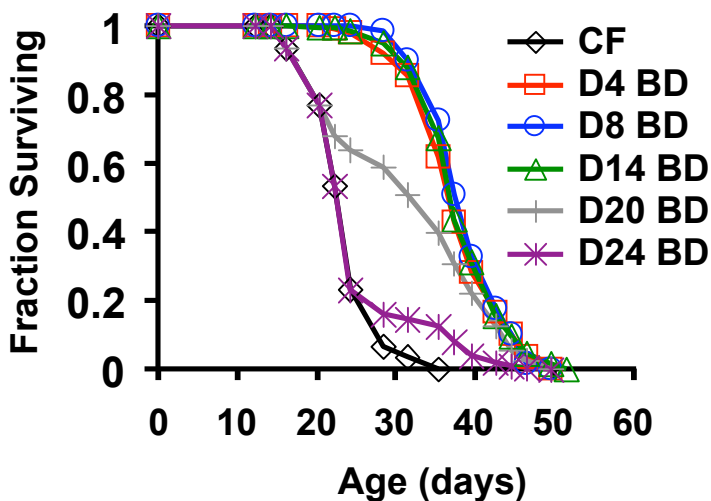**B.**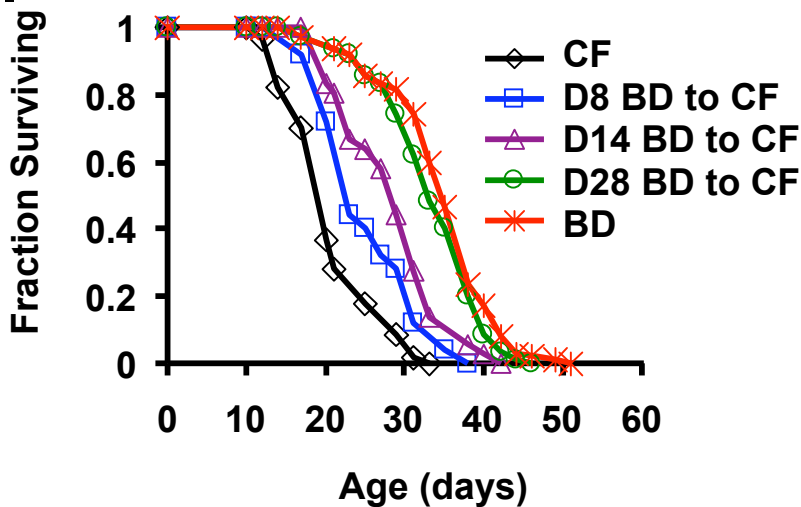**C.**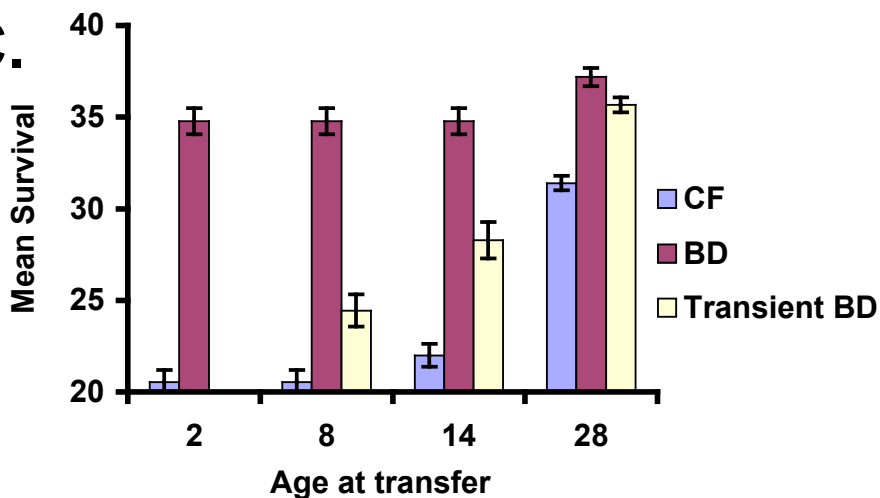

Supplement: 12861_2007_333_MOESM1_ESM.pdf [file 12861_2007_333_MOESM1_ESM.pdf]

**A.**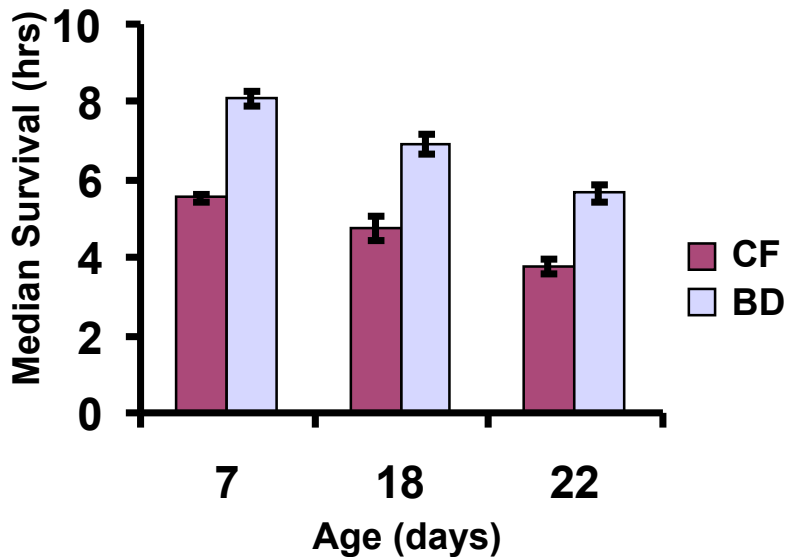**B.**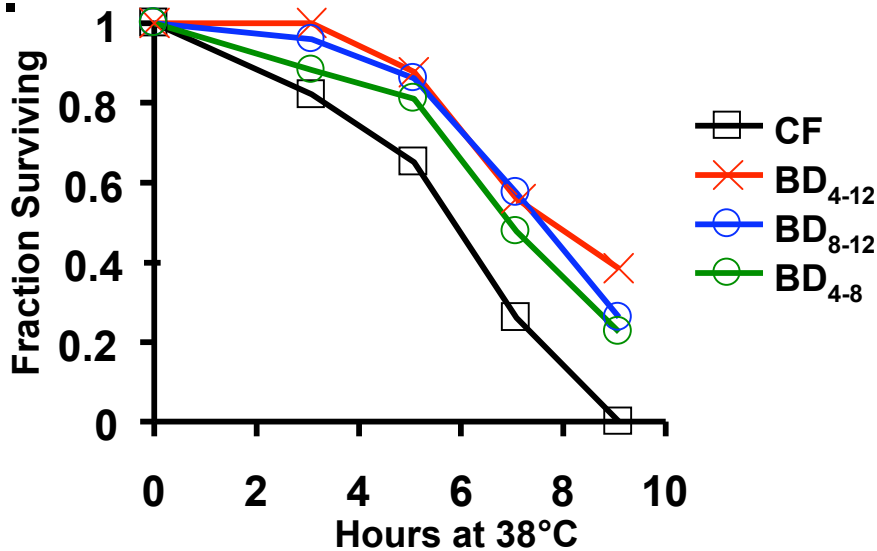

Supplement: 12861_2007_333_MOESM2_ESM.pdf [file 12861_2007_333_MOESM2_ESM.pdf]

**A.**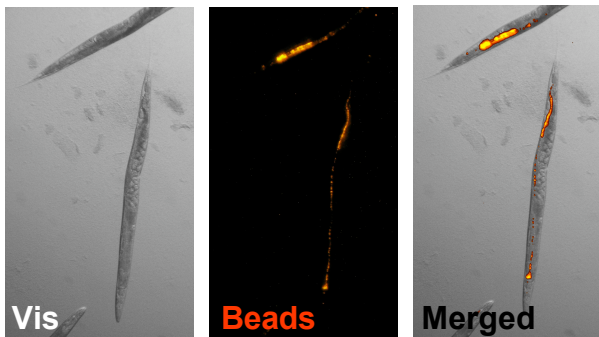**B.**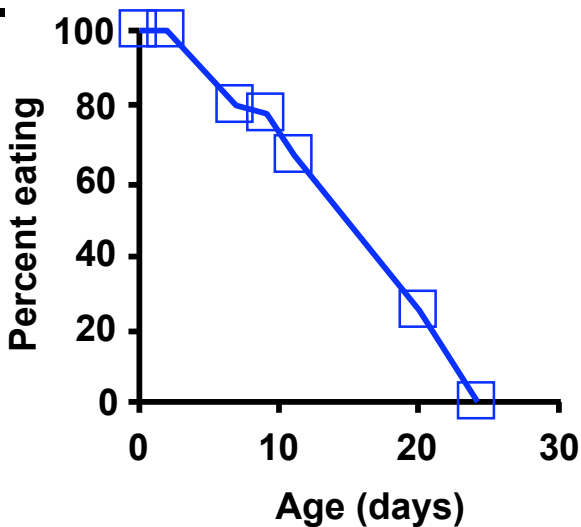**C.**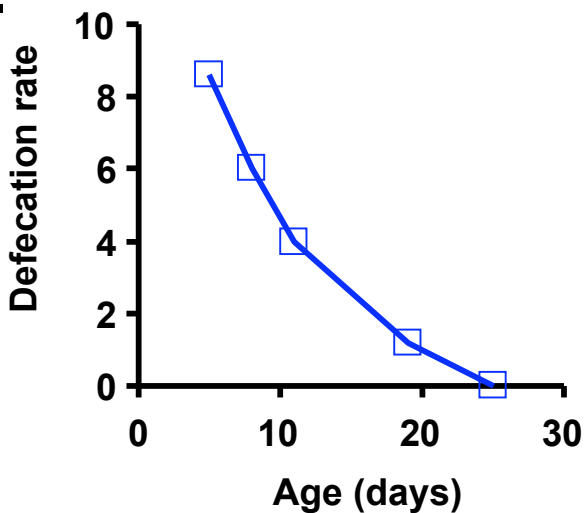

Supplement: 12861_2007_333_MOESM3_ESM.pdf [file 12861_2007_333_MOESM3_ESM.pdf]

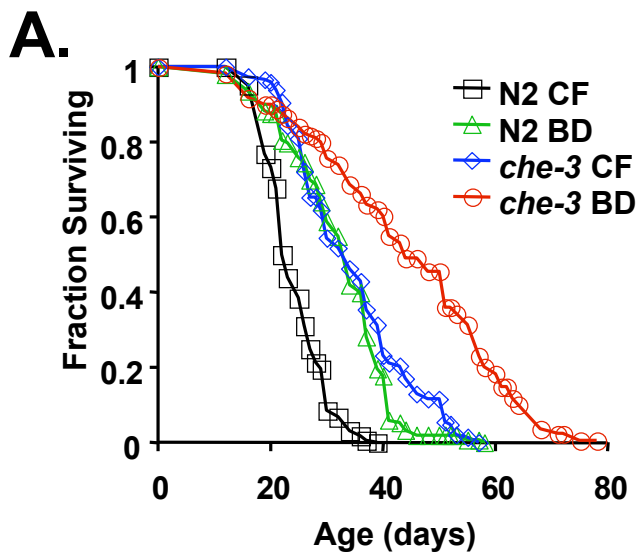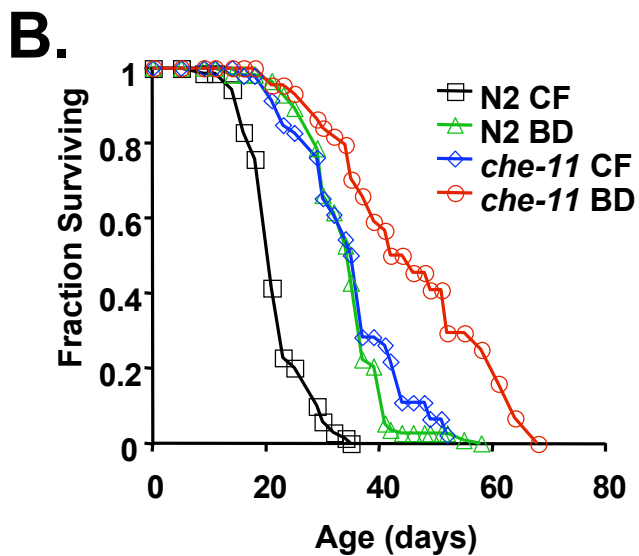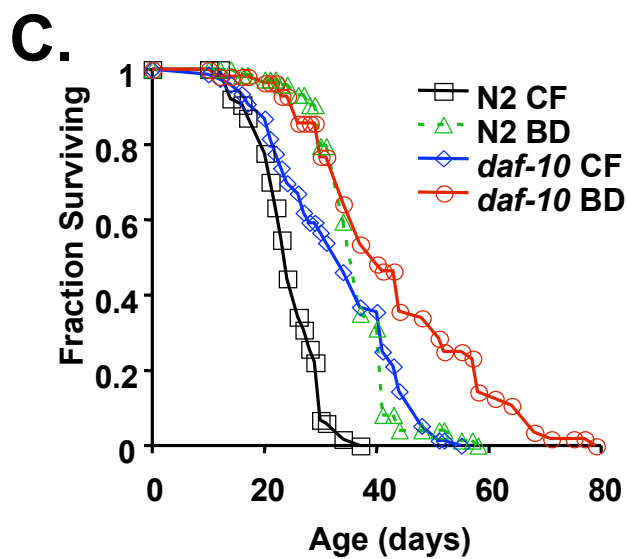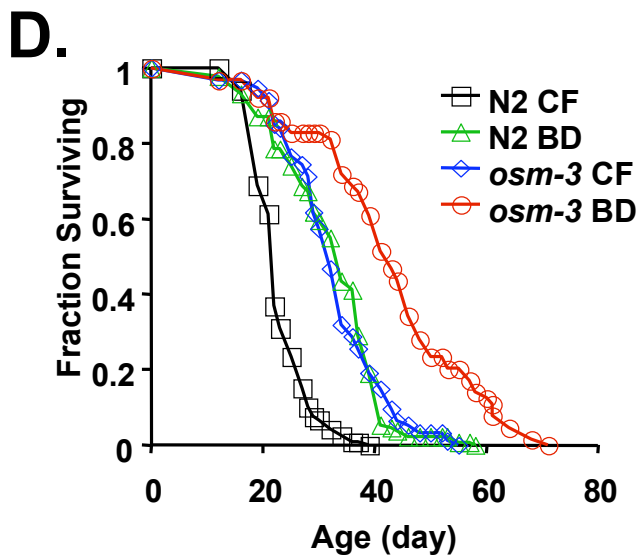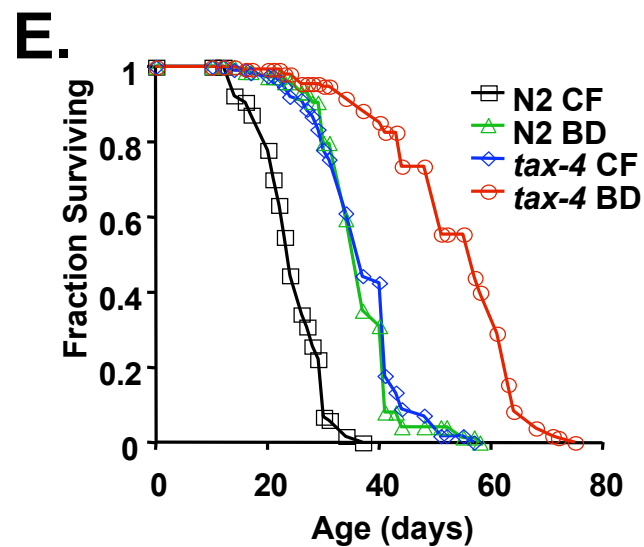

Supplement: 12861_2007_333_MOESM4_ESM.pdf [file 12861_2007_333_MOESM4_ESM.pdf]

**A.**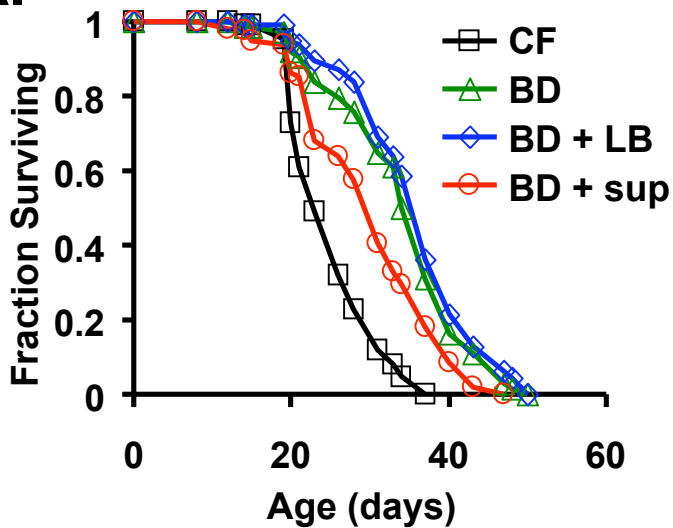**B.**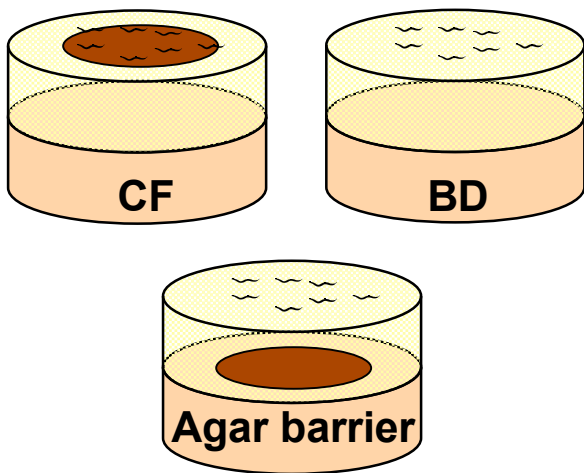**C.**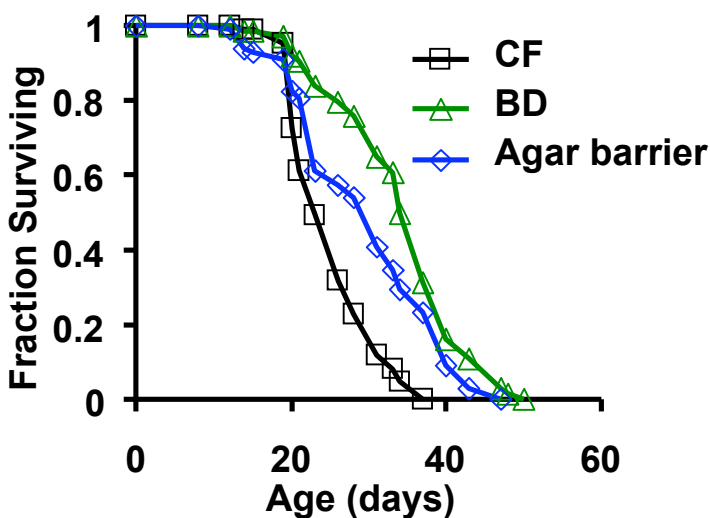

Supplement: 12861_2007_333_MOESM5_ESM.pdf [file 12861_2007_333_MOESM5_ESM.pdf]

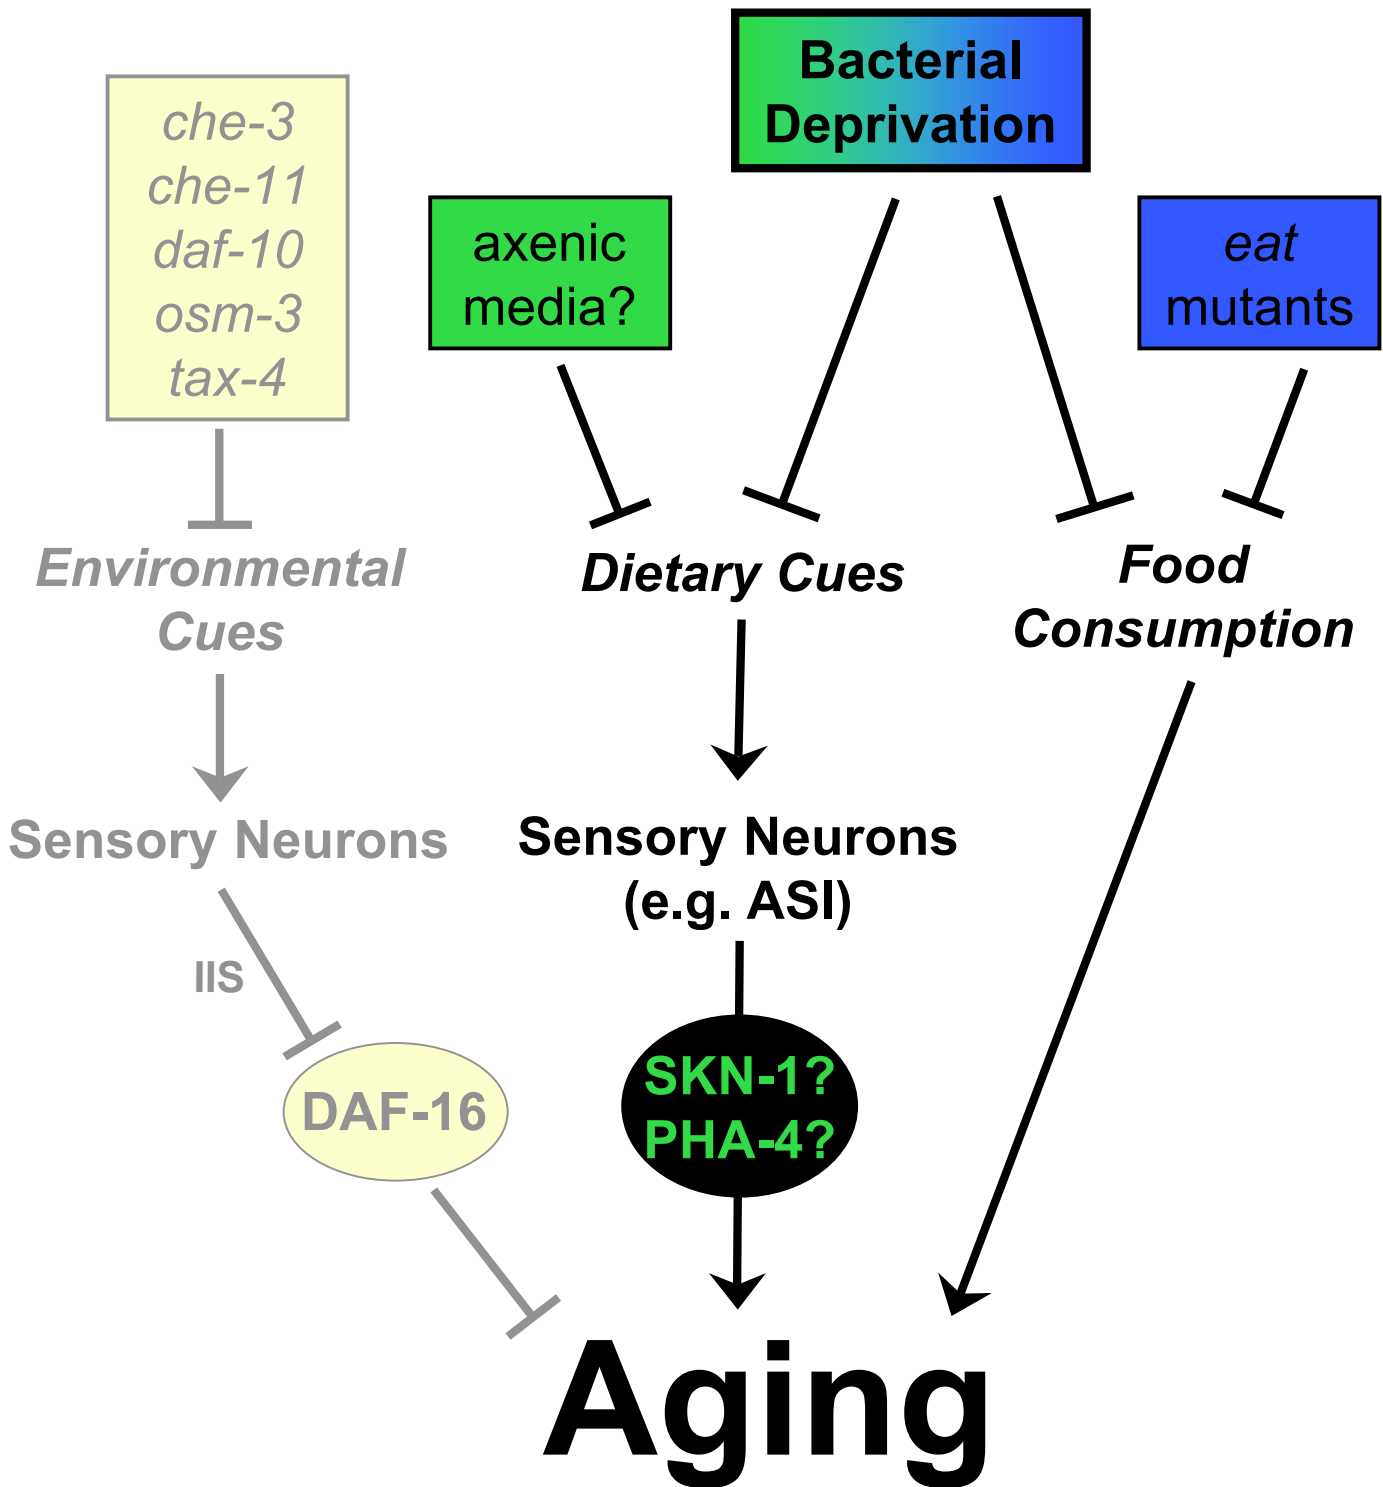

Supplement: 12861_2007_333_MOESM6_ESM.pdf [file 12861_2007_333_MOESM6_ESM.pdf]
